# Supplementary material
Source: PubMed Central journal article supplement (PMC9691516)
Supplement: NIHMS1815034-supplement-1.pdf [file NIHMS1815034-supplement-1.pdf]

Supplemental Table. Overview of ACP Specialist Training Modules.

| Module Title                                                    | Content Description                                                                                                                                                                                                                     |
|-----------------------------------------------------------------|-----------------------------------------------------------------------------------------------------------------------------------------------------------------------------------------------------------------------------------------|
| Launch Module                                                   | An introduction to the ACP Specialist Program and in-depth overview of the ACP Facilitation Guide.                                                                                                                                      |
| Module 1 - Advance Care Planning in Nursing Facilities          | Background information about ACP and the importance of knowing resident goals of care; the role of cultural and religious values to ACP decisions; and ethical and regulatory considerations surrounding ACP.                           |
| Module 2 – Person-Centered Goals of Care                        | Information about the three goals of care (Comfort Care, Maintaining Function, Prolonging Life)(43); identifying the risks and benefits of key treatment decisions; and the relationship between goals of care and treatment decisions. |
| Module 3 - Identifying and Supporting Surrogate Decision Makers | How to identify when surrogate decision-makers need to be involved; decisional standards for surrogate decision-making; and strategies to support surrogate decision makers.                                                            |
| Module 4 - Advance Care Planning Tools                          | Information about ACP documentation tools, including advance directives; relevant medical orders; and the POLST model.                                                                                                                  |
| Module 5 - Engaging your Team                                   | A description of each team member's role in the ACP process and strategies for engaging team members.                                                                                                                                   |
| Module 6 - ACP Facilitation Skills                              | In-depth review of each step of the ACP Facilitation guide; information about communication strategies (e.g., active listening); support in responding to emotions that may arise during ACP.                                           |
| Module 7 - Putting it All Together                              | A scenario-based review of one month in the life of a fictional ACP Specialist that walks viewers through the use of ACP Specialist tools and workflow planning.                                                                        |
| ACP Specialist Booster Module                                   | A review of the original training content includes example videos for ACP facilitation and scenarios to promote problem solving for implementation challenges.                                                                          |
